# Supplementary material for: Highly oxidative GaN:ZnO@α-Ga2O3 heterostructure as a visible-light-driven, round-the-clock photocatalyst for dye degradation and disinfection
Source: Royal Society of Chemistry journal article supplement (doi:10.1039/d4ta09029b), 2025-01-01
Supplement: d4ta09029b1.pdf [file d4ta09029b1.pdf]

## Highly oxidative GaN:ZnO@ $\alpha$ -Ga<sub>2</sub>O<sub>3</sub> heterostructure as a visible-light-driven round-the-clock photocatalyst for dye degradation and disinfection

Yan-Ling Hu,<sup>\*a1</sup> Zihan Zhao,<sup>b1</sup> Junjie Jiang,<sup>a</sup> Yadong Huang,<sup>c</sup> Huayu Ji,<sup>a</sup> Di Zhu,<sup>a</sup> Lianqi Zhang,<sup>a</sup> Linhan Zhan,<sup>a</sup> Yurong Wu,<sup>a</sup> Yuhui Zhang,<sup>a</sup> Kun Wu,<sup>a</sup> Yun Yang,<sup>d</sup> Tian Chai,<sup>\*b</sup> Sujuan Wu,<sup>\*c</sup> Guang-Ling Song<sup>\*c</sup>

<sup>a</sup> Fujian Provincial Key Laboratory of Functional Materials and Applications, School of Materials Science and Engineering, Xiamen University of Technology, Xiamen, 361024, China

<sup>b</sup> School of Environmental Science & Engineering, Xiamen University of Technology, Xiamen, 361024, China

<sup>c</sup> National Engineering Research Center for Magnesium Alloys, College of Materials Science and Engineering, Chongqing University, Chongqing 400044, China

<sup>d</sup> Research Institute for Biomimetics and Soft Matter, Fujian Provincial Key Laboratory for Soft Functional Materials Research, Department of Physics, Xiamen University, Xiamen 361005, China

<sup>e</sup> Department of Ocean Science and Engineering, Southern University of Science and Technology, Shenzhen, Guangdong 518055, China

\*Corresponding authors:

E-mail: huyanling@xmut.edu.cn

Email: chai@xmut.edu.cn

E-mail: sujuan.wu@cqu.edu.cn

E-mail: songgl@sustech.edu.cn

<sup>1</sup>Yan-Ling Hu and <sup>1</sup>Zi-Han Zhao contribute equally to this work as the first authors.

E-mail: huyanling@xmut.edu.cn

E-mail: hannazhao7415@163.com

Keywords: Photocatalyst; Round-the-clock; GaN:ZnO;  $\alpha$ -Ga<sub>2</sub>O<sub>3</sub>; Point defects;  
Environmental remediation

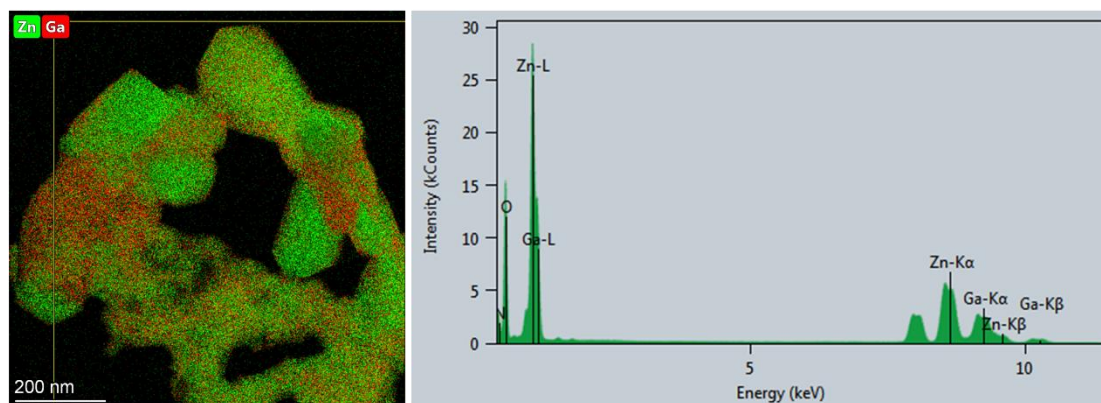

**Fig. S1** EDS/STEM mapping for elements Ga and Zn (at. %) and EDS spectrum from the yellow square of Untreated.

Table S1 Compositions of the yellow square in Untreated measured from EDS/STEM

| Element | Family | Atomic Fraction (%) |
|---------|--------|---------------------|
| N       | K      | 10.57               |
| O       | K      | 52.83               |
| Zn      | K      | 24.15               |
| Ga      | K      | 12.45               |

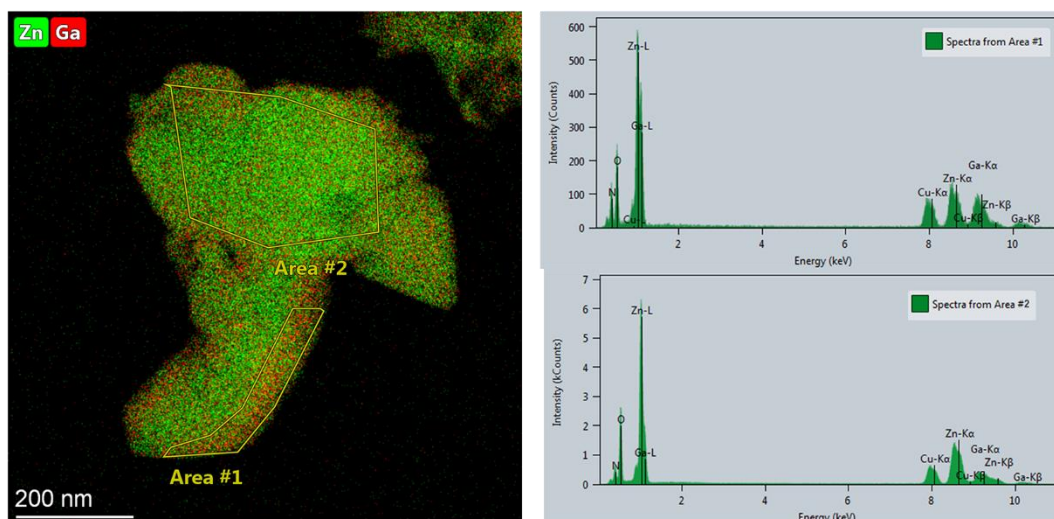

**Fig. S2** EDS/STEM mapping for elements Ga and Zn (at. %) and EDS spectrum from two yellow squares of S60.

Table S2 Compositions of the Area 1 in S60 measured from EDS/STEM

| Element | Family | Atomic Fraction (%) |
|---------|--------|---------------------|
| N       | K      | 22.64               |
| O       | K      | 37.75               |
| Zn      | K      | 21.74               |
| Ga      | K      | 17.86               |

Table S3 Compositions of the Area 2 in S60 measured from EDS/STEM

| Element | Family | Atomic Fraction (%) |
|---------|--------|---------------------|
| N       | K      | 12.75               |
| O       | K      | 48.49               |
| Zn      | K      | 29.48               |
| Ga      | K      | 9.29                |

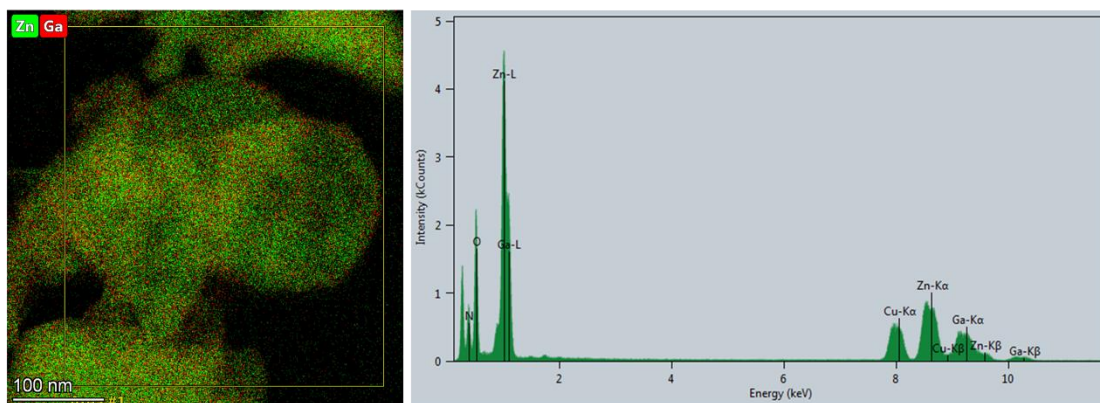

**Fig. S3** EDS/STEM mapping for elements Ga and Zn (at. %) and EDS spectrum from the yellow square of S60-HT.

Table S4 Compositions of the yellow square in S60-HT measured from EDS/STEM

| Element | Family | Atomic Fraction (%) |
|---------|--------|---------------------|
| N       | K      | 19.42               |
| O       | K      | 45.89               |
| Zn      | K      | 22.61               |
| Ga      | K      | 12.08               |

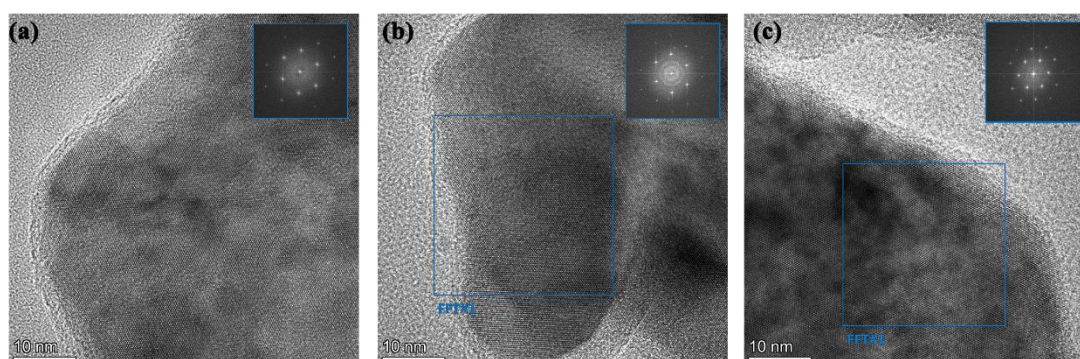

**Fig. S4** HRTEM images and the Fast Fourier Transform (FFT) patterns (insets) of (a) Untreated, (b) S60, and (c) S60-HT.

Table S5 Area Ratios for Fitted Peaks in N 1s XPS Spectra

|           | bonding (binding energy, eV) |       |                                   |        |
|-----------|------------------------------|-------|-----------------------------------|--------|
|           | 397.7                        | 396.3 | 395.8                             | 394.8  |
|           | N-H                          | Ga-N  | O <sub>N</sub> ...V <sub>Ga</sub> | Ga LMM |
| Untreated | 0.17                         | 0.30  | 0.38                              | 0.15   |
| S60       | 0.25                         | 0.31  | 0.36                              | 0.08   |
| S60-HT    | 0.23                         | 0.37  | 0.37                              | 0.03   |

Table S6 Area Ratios for Fitted Peaks in Ga 3d XPS Spectra

|           | bonding (binding energy, eV)                          |                |      |           |          |        |
|-----------|-------------------------------------------------------|----------------|------|-----------|----------|--------|
|           | V <sub>Ga</sub>                                       | V <sub>O</sub> | Ga-O | Ga-N      | Ga-(N-H) | Ga LMM |
|           | (V <sub>O</sub> -V <sub>Ga</sub> /Ga-V <sub>O</sub> ) |                |      |           |          |        |
|           | 21.7                                                  | 20.7-20.8      | 20.3 | 19.7-19.8 | 19.1     | 18.5   |
| Untreated | 0                                                     | 0.08           | 0.06 | 0.43      | 0.35     | 0.08   |
| S60       | 0                                                     | 0.19           | 0.11 | 0.37      | 0.31     | 0.02   |
| S60-HT    | 0.03                                                  | 0.18           | 0.10 | 0.39      | 0.30     | 0      |

Table S7 Area Ratios for Fitted Peaks in O 1s XPS Spectra

|           | bonding (binding energy, eV) |                       |             |
|-----------|------------------------------|-----------------------|-------------|
|           | 532.4-533.0                  | 531.3-531.9           | 530.3-530.7 |
|           | O <sub>ad</sub>              | Zn(Ga)-V <sub>O</sub> | Zn(Ga)-O    |
| Untreated | 0.27                         | 0.32                  | 0.41        |
| S60       | 0.19                         | 0.50                  | 0.31        |
| S60-HT    | 0.32                         | 0.51                  | 0.17        |

Table S8 Area Ratios for Fitted Peaks in Zn 2p XPS Spectra

|           | bonding (binding energy, eV)        |                   |        |                                   |
|-----------|-------------------------------------|-------------------|--------|-----------------------------------|
|           | 1023                                | 1022.5            | 1021.7 | 1021                              |
|           | V <sub>Zn</sub> ...Ga <sub>Zn</sub> | Zn-V <sub>O</sub> | Zn-O   | O <sub>N</sub> ...V <sub>Ga</sub> |
| Untreated | 0.07                                | 0.03              | 0.43   | 0.47                              |
| S60       | 0.12                                | 0.34              | 0.24   | 0.30                              |
| S60-HT    | 0.21                                | 0.22              | 0.30   | 0.27                              |

Table S9 Area Ratios for Fitted Peaks in O 1s XPS Spectra of S60-HT

|       | bonding (binding energy, eV) |                       |             |
|-------|------------------------------|-----------------------|-------------|
|       | 533                          | 531.7                 | 530.7-530.8 |
|       | O <sub>ad</sub>              | Zn(Ga)-V <sub>O</sub> | Zn(Ga)-O    |
| dark  | 0.41                         | 0.53                  | 0.06        |
| light | 0.58                         | 0.33                  | 0.09        |

Table S10 Area Ratios for Fitted Peaks in Ga 3d XPS Spectra of S60-HT

|       | bonding (binding energy, eV) |                |      |      |          |
|-------|------------------------------|----------------|------|------|----------|
|       | V <sub>Ga</sub>              | V <sub>O</sub> | Ga-O | Ga-N | Ga-(N-H) |
|       | 21.7                         | 20.8           | 20.3 | 19.8 | 19.1     |
| dark  | 0.03                         | 0.51           | 0.08 | 0.31 | 0.07     |
| light | 0.03                         | 0.42           | 0.14 | 0.33 | 0.08     |

Table S11 Area Ratios for Fitted Peaks in Zn 2p XPS Spectra of S60-HT

|       | bonding (binding energy, eV)        |                   |        |                                      |
|-------|-------------------------------------|-------------------|--------|--------------------------------------|
|       | 1023.1                              | 1022.3            | 1021.5 | 1020.5                               |
|       | V <sub>Zn</sub> ...Ga <sub>Zn</sub> | Zn-V <sub>O</sub> | Zn-O   | Zn-O <sub>N</sub> ...V <sub>Ga</sub> |
| dark  | 0.17                                | 0.44              | 0.33   | 0.06                                 |
| light | 0.18                                | 0.51              | 0.25   | 0.06                                 |

Table S12 Area Ratios for Fitted Peaks in N 1s XPS Spectra of S60-HT

|       | bonding (binding energy, eV) |       |                                   |
|-------|------------------------------|-------|-----------------------------------|
|       | 398.5                        | 397.0 | 395.7                             |
|       | N-H                          | Ga-N  | O <sub>N</sub> ...V <sub>Ga</sub> |
| dark  | 0.23                         | 0.30  | 0.47                              |
| light | 0.29                         | 0.28  | 0.43                              |
